1 **NOXA expression drives synthetic lethality to RUNX1 inhibition in pancreatic cancer**

2 Josefina Doffo<sup>1,2</sup>, Stefanos A. Bamopoulos<sup>1</sup>, Hazal Köse<sup>1</sup>, Felix Orben<sup>3</sup>, Chuanbing Zang<sup>1</sup>,  
3 Miriam Pons<sup>4</sup>, Alexander T. den Dekker<sup>5</sup>, Rutger W. W. Brouwer<sup>5</sup>, Apoorva Baluapuri<sup>6</sup>, Stefan  
4 Habringer<sup>1</sup>, Maximilian Reichert<sup>3</sup>, Anuradha Illendula<sup>7</sup>, Oliver H. Krämer<sup>4</sup>, Markus Schick<sup>1</sup>,  
5 Elmar Wolf<sup>6</sup>, Wilfred F. J. van IJcken<sup>5</sup>, Irene Esposito<sup>8</sup>, Ulrich Keller<sup>1, 9, 10</sup>, Günter Schneider<sup>3,</sup>  
6 <sup>9, 11</sup> and Matthias Wirth<sup>1</sup>

7 <sup>1</sup>Department of Hematology, Oncology and Cancer Immunology, Campus Benjamin Franklin,  
8 Charité - Universitätsmedizin Berlin, corporate member of Freie Universität Berlin and  
9 Humboldt-Universität zu Berlin, Berlin, Germany

10 <sup>2</sup>Stowers Institute for Medical Research, Kansas City, MO, USA

11 <sup>3</sup>Department of Medicine II (Gastroenterology and GI Oncology), Klinikum rechts der Isar,  
12 Technische Universität München, School of Medicine, München, Germany

13 <sup>4</sup>Department of Toxicology, University Medical Center, Mainz, Germany

14 <sup>5</sup>Center for Biomimetics and Department of Cell Biology, Erasmus University Medical Center,  
15 Rotterdam, The Netherlands

16 <sup>6</sup>Cancer Systems Biology Group, Department of Biochemistry and Molecular Biology,  
17 Biocenter, University of Würzburg, Würzburg, Germany

18 <sup>7</sup>Department of Pharmacology, University of Virginia, Charlottesville, VA, USA

19 <sup>8</sup>Institute of Pathology, Heinrich Heine University and University Hospital of Düsseldorf,  
20 Düsseldorf, Germany.

21 <sup>9</sup>German Cancer Research Center (DKFZ) and German Cancer Consortium (DKTK),  
22 Heidelberg, Germany

23 <sup>10</sup>Max-Delbrück-Center for Molecular Medicine, Berlin, Germany

24 <sup>11</sup>Department of General, Visceral and Pediatric Surgery, University Medical Center Göttingen,  
25 Göttingen, Germany

26 **Corresponding author:**

27 Matthias Wirth, Department of Hematology, Oncology and Cancer Immunology, Campus  
28 Benjamin Franklin, Charité - Universitätsmedizin Berlin, Hindenburgdamm 30, 12203 Berlin,  
29 Germany, e-mail: matthias.wirth@charite.de

30 **Keywords:** NOXA / Apoptosis / PDAC / RUNX1 / pancreatic cancer

## 31 **Significance**

32 Recent evidence demonstrated the existence of molecular subtypes in pancreatic ductal  
33 adenocarcinoma (PDAC), which resist all current therapies. The paucity of therapeutic options,  
34 including a complete lack of targeted therapies, underscore the urgent and unmet medical  
35 need for the identification of targets and novel treatment strategies for PDAC. Our study  
36 unravels a function of the transcription factor RUNX1 in apoptosis regulation in PDAC. We  
37 show that pharmacological RUNX1 inhibition in PDAC is feasible and leads to NOXA-  
38 dependent apoptosis. The development of targeted therapies that influence the transcriptional  
39 landscape of PDAC might have great benefits for patients who are resistant to conventional  
40 therapies. RUNX1 Inhibition as a new therapeutic intervention offers an attractive strategy for  
41 future therapies.

42

## 43 **Abstract**

44 Evasion from drug-induced apoptosis is a crucial mechanism of cancer treatment resistance.  
45 The pro-apoptotic protein NOXA marks an aggressive pancreatic ductal adenocarcinoma  
46 (PDAC) subtype. To identify drugs that unleash the death-inducing potential of NOXA, we  
47 performed an unbiased drug screening experiment. In *NOXA*-deficient isogenic cellular models  
48 we identified an inhibitor of the transcription factor heterodimer CBF $\beta$ /RUNX1. By genetic gain  
49 and loss of function experiments we validated that the mode of action depends on RUNX1 and  
50 NOXA. Of note, RUNX1 expression is significantly higher in PDACs compared to normal  
51 pancreas. We show that pharmacological RUNX1 inhibition significantly blocks tumor growth  
52 *in vivo* and in primary patient-derived PDAC organoids. Through genome wide analysis, we  
53 detected that *RUNX1*-loss reshapes the epigenetic landscape, which gains H3K27ac  
54 enrichment at the *NOXA* promoter. Our study demonstrates a previously unknown mechanism  
55 of NOXA-dependent cell death, which can be triggered pharmaceutically. Therefore, our data  
56 show a novel way to target a therapy resistant PDAC, an unmet clinical need.

57

## 58 **Introduction**

59 Pancreatic ductal adenocarcinoma (PDAC) is an aggressive disease often diagnosed at an  
60 advanced stage. The incidence of PDAC is steadily increasing, and PDAC is predicted to be  
61 the second leading cause of cancer-related death by 2030 (1). Evasion of apoptosis is a  
62 characteristic of PDAC and is often associated with treatment resistance (2, 3). A dysregulated  
63 transcription commonly results in apoptosis resistance (4). Therefore, the identification of novel  
64 concepts to reactivate apoptosis by disrupting cancerous transcription programs is a promising  
65 approach for the effective elimination of PDAC cells (3, 5).

66 Comprehensive integrated genome analyses from RNA expression profiles in recent years  
67 revealed different subtypes of PDAC with variable biology and therapeutic responsiveness (6-  
68 9). *NOXA* (latin for damage; also known as PMAIP1 - Phorbol-12-myristate-13-acetate-  
69 induced protein 1) is part of an identifier gene-set for the quasi-mesenchymal subtype of the  
70 disease (8). This subtype overlaps with the described basal-like and squamous subtype of the  
71 disease, which is particularly resistant to the currently used chemotherapeutics (7, 9).

72 *NOXA* belongs to the BCL-2 homology (BH) BH3-only subgroup of the B-cell lymphoma 2  
73 (*BCL2*) protein family which is essential for the regulation of cell intrinsic apoptosis (10). *BCL2*  
74 proteins are divided into sensor, effector and protector proteins (10). The classical anti-  
75 apoptotic protector proteins including Myeloid cell leukemia 1 (*MCL1*) inhibit effector proteins  
76 (e.g. Bcl-2-associated X protein) thereby blocking apoptosis. Pro-apoptotic sensor proteins  
77 including *NOXA*, which directly binds to *MCL1*, neutralize the anti-apoptotic function of the  
78 protector proteins (10), leading to the initiation of apoptotic cell death. In PDAC, *NOXA* is tightly  
79 regulated at the transcriptional level, and transcriptional activation of *NOXA* by HDAC-  
80 inhibitors or proteasome inhibitors contribute to induce the cell intrinsic apoptosis pathway (11-  
81 13). Furthermore, *NOXA* is regulated by multiple transcription factors including p53 and is  
82 involved in apoptosis under genotoxic stress (14, 15).

83 Runt-related (*RUNX*) proteins are master regulators involved in a broad range of biological  
84 processes including proliferation, differentiation and apoptosis (16). DNA binding of these

85 transcription factors is mediated by heterodimerization of a core DNA binding factor alpha  
86 chain (CBF $\alpha$ ), composed of one of the three RUNX family members, RUNX1-3, to the non-  
87 DNA binding core binding factor beta (CBF $\beta$ ). Each of the three RUNX family members play  
88 important roles in different stages of tumor development (17). As has been shown in mouse  
89 models, knockouts of any of the three RUNX transcription factors exhibit significant  
90 developmental defects: RUNX1 plays an important role in hematopoiesis (18), RUNX2 in bone  
91 development (19) and RUNX3 in the gastrointestinal tract (20) and in neurogenesis (21). RUNX  
92 expression patterns are highly dynamic and depend on the stage of differentiation,  
93 development and environmental conditions (22). In addition, RUNX transcription factors are  
94 expressed in almost all cancers (23). Besides its implication in leukemogenesis (24), RUNX1  
95 is strongly expressed in a broad spectrum of solid tumors (25) and is associated with poor  
96 prognosis in PDAC (26). Depending on the cellular context, RUNX1 can act both oncogenic  
97 and tumor suppressive in solid tumors (27). RUNX1 interacts with various co-factors to shape  
98 gene expression. RUNX1-dependent activation of target genes is mediated through an  
99 interaction with CBP/p300 (28) and the protein arginine methyltransferase 1 (PRMT1) (29).  
100 The inhibitory function of RUNX1 is achieved by interaction with co-repressors such as the  
101 Sin3A-HDAC corepressor complex (30).

102 In this study, we aimed at identifying novel strategies affecting the delicate balance of NOXA  
103 expression to drive cell death in an aggressive subtype of PDAC. We found that inhibition of  
104 RUNX1 led to a global gain of H3K27ac enrichment contributing to the activation of the  
105 proximal *NOXA* promoter region and suggest a strategy to overcome treatment resistance in  
106 an aggressive subtype of PDAC with inferior prognosis.

107

## 108 **Materials and Methods**

### 109 **Cell culture, cell viability assay**

110 Cell lines were cultured in Dulbecco's Modified Eagle's Medium (Thermo Fisher Scientific,  
111 #41965062) or Roswell Park Memorial Institute (RPMI) 1640 Medium (Thermo Fisher  
112 Scientific, #21875091) supplemented with 10% FBS (Thermo Fisher Scientific, #10270106)

113 and 1% Penicillin/Streptomycin (Thermo Fisher Scientific, #15070063). They were passaged  
114 up to 14 times in a 1:10 dilution every 3-4 days. Murine PDAC cell lines were generated from  
115 *Kras*<sup>G12D</sup> driven mouse models as described (13). For all cell lines used, PCR-based  
116 mycoplasma tests were performed at regular intervals. Cell viability was measured by MTT-  
117 Test (Sigma-Aldrich, #M5655). Detailed information on the procedures cell viability, drug  
118 screening and colony formation assay in Supplementary Materials and Methods.

119

### 120 **Patient-derived organoids**

121 PDAC biopsies and tissues were received from endoscopy punctures or surgical resection. 3D  
122 organoids were collected, propagated, and analyzed in agreement with the declaration of  
123 Helsinki. This study was approved by the ethical committee of TUM (Project 207/15). Written  
124 informed consent from the patients for research use of tumor material was obtained prior to  
125 the use. Detailed information in Supplementary Materials and Methods.

126

### 127 ***In vivo* drug efficacy analysis in mice, IHC**

128 Xenograft assays were performed by EPO (Experimental Pharmacology and Oncology, Berlin-  
129 Buch). All animal experiments were approved by the local responsible authorities and  
130 performed in accordance with the German Animal Protection law. Detailed information in  
131 Supplementary Materials and Methods.

132

### 133 **Statistical Analysis, qChIP, ChIPseq, RNAseq, ATAC seq, 4C, qPCR, Western blot,** 134 **CRISPR-editing**

135 Detailed information on the procedures and data analyses in Supplementary Materials and  
136 Methods and in STable 5.

137

## 138 **Results**

### 139 **High *NOXA* mRNA expression is associated with an aggressive PDAC subtype**

140 As a stress response, tumor cells may express pro-apoptotic effectors that can be neutralized  
141 by anti-apoptotic counterparts, thus dampening the apoptotic response. Such tumor cells  
142 expose apoptotic potential. To investigate, if classical pro-apoptotic BH3-only proteins may  
143 contribute to this phenotype, we analyzed the mRNA expression of BH3-only genes (6) and  
144 filtered for transcriptome profiles of human PDAC tumors (Fig. 1A). From this data, we  
145 extracted indicated classical BH3-only genes, performed a hierarchical clustering based on the  
146 mRNA expression of the BH3-only genes and subdivided PDAC patient samples into the  
147 squamous subtype and combined the ADEX-, classical- and the immunogenic subtypes as  
148 “other” subtypes. We subsequently determined if the mRNAs of the listed classical BH3-only  
149 members are significantly enriched in these two groups. Of note, specifically high expression  
150 of *NOXA* was significantly ( $p < 0.001$ ) associated with the squamous subtype (Fig. 1A and  
151 SFig1A), which is in line with the described expression in quasi-mesenchymal (QM) cancers  
152 (8). In accordance with this finding, high *NOXA* expression ( $>75^{\text{th}}$  percentile) characterized a  
153 PDAC patient cohort with inferior survival as compared to patients with low *NOXA* expression  
154 ( $<25^{\text{th}}$  percentile) in ICGC/Bailey et al. (Fig. 1B and SFig1B) and TCGA datasets (SFig. 1C).  
155 We hypothesized that the high expression of *NOXA* indicates that these tumors harbor an  
156 apoptotic potential, and that shifting the balance of apoptosis regulators to a pro-apoptotic state  
157 may constitute a therapeutic strategy.

158

### 159 **Identification of a synthetic lethal interaction of *NOXA* and inhibition of *RUNX1***

160 By analyzing transcriptome profiles, we selected human PDAC cell lines of the quasi-  
161 mesenchymal subtype (8) (SFig 1D) and *Kras*<sup>G12D</sup>-driven murine PDAC cell lines that exhibit  
162 relatively high basal *Noxa* mRNA expression (SFig. 1E) for cross-species validation to identify  
163 drugs that affect the apoptotic balance. To investigate vulnerabilities specifically created by  
164 *NOXA* expression, we generated human and murine isogenic PDAC cell line models with  
165 genetically defined *NOXA* status (SFig. 2A-D). To prove *NOXA* deficiency, we performed

166 western blotting of the two human PDAC cell lines PSN1 and MiaPaCa-2. NOXA protein was  
167 absent in *NOXA*<sup>ko</sup> cell lines (Fig. 1C). Importantly, *NOXA* deficiency did not influence the  
168 proliferation of the isogenic cell lines (Fig. 1D).

169 To identify vulnerabilities associated with NOXA, we next performed a drug screening with a  
170 total of 1842 compounds in *NOXA*-proficient (parental) and *NOXA*-deficient (*NOXA*<sup>ko</sup>) cells and  
171 measured viability (Fig. 1E). Drug testing and viability assays were performed with a single  
172 concentration of 600 nM, as previously described (13). For identification of effects due of the  
173 *NOXA* status, we used a cut-off of 10% difference in viability (Fig. 1F). Out of the 1842  
174 compounds we identified 50 drugs that showed higher efficiency in parental cell lines compared  
175 to *NOXA*<sup>ko</sup> cell lines. Importantly, within the hits found, we identified topoisomerase and  
176 proteasome inhibitors, which is in line with data from previous studies (11-13), underlining the  
177 robustness of our screening experiment (STable 1). From our screening hits, we selected for  
178 specific targeted molecules (target specificity) and novelty (Fig. 1E) and further validated 12  
179 hits with multi-dose experiments (Fig. 1F). Only one of these twelve compounds analyzed in  
180 the validation experiments, AI-10-49, showed no growth inhibition in *NOXA*<sup>ko</sup> cell lines whereas  
181 viability of *NOXA*-proficient cells was dose-dependently reduced (Fig. 1F). AI-10-49 was  
182 originally designed to inhibit the interaction of the oncofusion protein CBF $\beta$ -SMMHC with  
183 RUNX1 (32). The lead compound of the bivalent AI-10-49 has been shown to inhibit  
184 RUNX1/CBF $\beta$  (33). Co-immunoprecipitations with either RUNX1 or CBF $\beta$  revealed AI-10-49  
185 as RUNX1/CBF $\beta$  inhibitor in MiaPaCa-2 cells (SFig. 2E). Additionally, using the  
186 SwissTargetPrediction tool (34), CBF $\beta$  was a predicted target of this compound (STable 2).  
187 In summary, our data suggest that impairment of RUNX1 activity may affect *NOXA*-dependent  
188 execution of cell death in PDAC.

189

### 190 **Induction of NOXA by CBF $\beta$ /RUNX1 inhibition**

191 To investigate whether the AI-10-49-induced drop in viability is mediated by induction of the  
192 apoptotic process, we performed fluorometric analysis of Annexin V/PI stained PDAC cells.  
193 Indeed, the reduced viability in parental cell lines upon AI-10-49 treatment was clearly



194 associated with a significant induction of cell death in parental cells, whereas only marginal  
195 apoptosis induction was observed in *NOXA*<sup>ko</sup> cells (Fig. 1G).

196 We next investigated whether an altered expression of other BCL2 family members such as  
197 MCL1, BCL2, BCL<sub>xL</sub>, BIM, BID, BAK or BAX mediates AI-10-49-induced apoptosis. We  
198 detected PARP cleavage but did not detect differential expression of these BCL2 family  
199 proteins 6 hours and 24 hours after AI-10-49 treatment (Fig. 1H, SFig. 3A, B), a marked  
200 induction of NOXA protein (Fig. 1I) and *NOXA* mRNA expression (Fig. 1I) was observed upon  
201 treatment with AI-10-49. In HCT116 cells harboring wild-type p53, a DNA damage stimulus  
202 induced both RUNX1 and p53 and activated p53 target genes, including *NOXA* (35). To test if  
203 p53 is involved in AI-10-49 induced *NOXA* expression we treated murine cell lines harboring  
204 either wildtype, mutant or deleted p53- (SFig. 3C) with AI-10-49 and the topoisomerase II  
205 inhibitor etoposide (SFig. 3D). While *Noxa* induction was highest in wildtype p53 cells upon  
206 etoposide treatment, we observed a rather uniform induction of *Noxa* in each of these cell lines  
207 after AI-10-49 treatment (SFig. 3D). Since p53 is mutated in the human PDAC cell lines PSN1  
208 and MiaPaCa-2 we also analyzed the expression of the p53 family member p63, but did not  
209 detect significant regulation (SFig. 3E). Both p63 and mutant p53 showed no difference in  
210 expression at early time points after treatment with AI-10-49, but tended to show decreased  
211 expression after 48 h and 72 h, respectively (SFig. 3B,E). Our data show that both p53<sup>mut</sup> and  
212 RUNX1 are not induced upon AI-10-49 treatment (SFig. 3B, E). Contrary, we rather observed  
213 a decreased expression of RUNX1 after AI-10-49 treatment in MiaPaCa-2 and PSN1 cells  
214 (SFig. 3E).

215 Next, to substantiate caspase-induced apoptosis, we examined AI-10-49 together with the  
216 pan-caspase inhibitor zVAD-FMK by Annexin V/PI FACS. Here, we observed a significant  
217 rescue in apoptosis induction (Annexin V<sup>+</sup>/PI<sup>-</sup> fraction) (SFigure 3F). Both fractions, i.e.  
218 Annexin V<sup>+</sup>/PI<sup>-</sup> and Annexin V<sup>+</sup>/PI<sup>+</sup>, remained unaffected in *NOXA*<sup>ko</sup> cells, indicating the  
219 relevance of NOXA in cell death (SFigure 3F).

220 To further investigate the role of NOXA in AI-10-49 induced cell death, we generated MiaPaCa-  
221 2 cells stably expressing the CRISPR activator (CRISPRa) dCas9-MS2-p65-HSF1 (MpH), and

222 an established *NOXA* sgRNA to endogenously overexpress *NOXA* (SFig. 2E, SFig. 3G).  
223 *NOXA*-CRISPRa cells phenocopied AI-10-49 treated cells in clonogenic assays and, more  
224 importantly, *NOXA*-CRISPRa cell growth was drastically inhibited when treated with AI-10-49  
225 (SFig. 3H, I).

226 Together, our data show that inhibition of *RUNX1* by AI-10-49 induces *NOXA* mRNA and  
227 protein expression and thereby drives *NOXA*-dependent apoptosis.

228

### 229 ***RUNX1* is upregulated in pancreatic cancer and suppresses *NOXA* expression**

230 Understanding the mode of action of drugs is critical for the implementation of patient  
231 stratification strategies. To address this question, we next investigated how AI-10-49 induces  
232 *NOXA* expression. Since AI-10-49 inhibits the interaction between CBF $\beta$  and a DNA binding  $\alpha$   
233 subunit encoded by *RUNX* proteins (16), we tested whether loss of *RUNX* expression affects  
234 *NOXA* expression in knockouts of all three *RUNX* genes *RUNX1*, *RUNX2* and *RUNX3* in  
235 MiaPaCa-2 cells (SFig 2F). Remarkably, we observed an induction of *NOXA* mRNA solely in  
236 *RUNX1* knockout cells (Fig. 2A), arguing for a *RUNX1*-specific repression of the *NOXA* gene.  
237 We validated this effect by siRNA-mediated *RUNX1* depletion in Panc1, AsPC1 and MiaPaCa-  
238 2 cells (SFig. 4A). In addition to the induction of *NOXA* mRNA, we also observed a significant  
239 *NOXA* induction in *RUNX1*<sup>ko</sup> cells at the protein level (Fig. 2B). To analyze whether *RUNX1*<sup>ko</sup>  
240 cells have a growth disadvantage, we compared colony formation of *RUNX1*<sup>ko</sup> cells to the  
241 parental cell line. Here, we observed significantly reduced formation of colonies (Fig. 2C),  
242 which phenocopied the effects observed in AI-10-49 treated cells (SFig. 3H, I). In addition,  
243 *RUNX1*<sup>ko</sup> cells showed an increased cell death rate at basal levels, as demonstrated by  
244 Annexin V flow cytometry (Fig 2D). To demonstrate the specificity of AI-10-49 in this context,  
245 we applied AI-10-49 in two *RUNX1*<sup>ko</sup> clones as well as in *RUNX1* siRNA-treated MiaPaCa-2  
246 cells. Although we did not observe a consistent effect in the *RUNX1* knockout clones, which is  
247 probably related to the difficult cultivation of these cells, the use of siRNA, on the other hand,  
248 showed reproducible effects equivalent to a doubling of the GI<sub>50</sub> value, confirming the

249 dependence on RUNX1 (SFig. 4B). These genetic experiments identify RUNX1 as negative  
250 regulator of *NOXA* gene expression.

251 To further investigate the relevance of RUNX1 in PDAC, we analyzed RUNX1 expression in  
252 human and murine datasets. We found that RUNX1 indeed is transcriptionally upregulated in  
253 pancreatic cancer in all three datasets investigated (Fig. 2E, SFig4C). In addition, RUNX1 was  
254 expressed in pancreatic cancer, whereas it was not detected in normal pancreas on protein  
255 level (Fig. 2F). In premalignant *Kras*<sup>G12D</sup> driven murine pancreatic epithelial cells *Runx1* mRNA  
256 (Fig. 2G) and RUNX1 target gene signatures (Fig. 2H) were significantly enriched compared  
257 to normal pancreatic epithelial cells, displaying specificity for RUNX1 expression in non-  
258 stromal tumor-initiating cells. During PDAC progression RUNX1 expression is maintained.  
259 Suspecting a RUNX1-mediated repression of the *NOXA* gene, we re-analyzed the  
260 ICGC/Bailey et al. (6) and Collisson et al. (8) transcriptome datasets and indeed observed a  
261 negative correlation trend of *RUNX1* and *NOXA* expression in the squamous/quasi-  
262 mesenchymal PDAC subtype (SFig. 4D). To investigate whether RUNX1 expression was the  
263 main contributing factor to *NOXA* expression, we performed a shRNA-mediated knockdown of  
264 *NOXA* in *RUNX1*<sup>ko</sup> cells (SFig. 4E). Congruent with our initial findings, the basal apoptosis  
265 rates were restored (SFig. 4F).

266 Taken together, these data argue for a RUNX1-mediated repression of *NOXA* expression.

267

### 268 **RUNX1 inhibition induces *NOXA* through amplification of active chromatin marks**

269 To understand the immediate effect of AI-10-49 treatment, we performed RNAseq analyses of  
270 MiaPaCa2 cells 6 h upon treatment in comparison to vehicle treated cells. Apart from *NOXA*,  
271 which was upregulated in treated cells, less than 300 genes, were found to be differentially  
272 expressed, suggesting a high specificity of AI-10-49 (Fig. 3A). Gene set enrichment analyses  
273 revealed a significant apoptosis signature and a negative enrichment score for RUNX1 targets  
274 (Fig. 3B, STable 3) upon AI-10-49 treatment. To analyze the impact of RUNX1 inhibition on  
275 chromatin accessibility we performed assays for transposase accessible chromatin with high-  
276 throughput sequencing (ATAC-seq). We observed reduced chromatin accessibility after AI-10-

277 49 treatment, compared to the vehicle control 6 h after AI-10-49 treatment (Fig. 3C). In addition,  
278 a comparison of parental MiaPaCa-2 cells with isogenic *RUNX1* deficient cells showed a an  
279 increased accessibility of the chromatin.

280 To investigate the association of *RUNX1* inhibition with regulation of chromatin dynamics, we  
281 performed H3K27ac ChIPseq experiments to detect transcriptionally active chromatin. A cross-  
282 coverage and fingerprint plot showed adequate signal strength in enriched regions (SFig. 5A,  
283 B). Globally, H3K27ac signal was increased in both replicates (Fig. 3D, SFig. 5C), arguing for  
284 a neutralization of the repressor activity of *RUNX1*.

285 We also performed *RUNX1* ChIPseq to assess the impact of *RUNX1* inhibition on *RUNX1*  
286 binding. This analysis showed a peak downstream of the *NOXA* gene, which we hypothesized  
287 to be an enhancer region and coined it downstream binding site 1 (dBS1). To substantiate our  
288 findings, we analyzed *RUNX1* ChIPseq from K562 and MCF10A cells. Indeed, we found an  
289 overlap of our identified peak in both ChIPseq datasets and were thus able to validate the peak  
290 identified in MiaPaCa-2 cells (SFig. 6A). In both, ChIPseq and qChIP experiments, we  
291 observed a drop in *RUNX1* binding at downstream binding site 1 (dBS1) and an increased  
292 acetylation of H3K27 at the *NOXA* promoter upon AI-10-49 treatment (Fig. 3E, F), indicating  
293 an activation of the gene by acetylation of the proximal promoter region of *NOXA*, subsequently  
294 leading to increased gene expression. To analyze the spatial organization of the *NOXA* region,  
295 we performed chromosome conformation capture assays (4C) to capture interactions between  
296 the *NOXA* locus (view point) and all other genomic loci. Here, we found a hitherto unknown  
297 interaction with a downstream region of the *NOXA* gene, which is abrogated upon AI-10-49  
298 treatment and in *RUNX1*<sup>ko</sup> cells (Fig. 3E, arrow/dBS1, SFig. 6A). Binding of the nuclear protein  
299 CCCTC-binding factor (CTCF), which marks insulator regions to prevent crosstalk between  
300 active and inactive chromatin, was unaffected (Fig. 3E). Additionally, *RUNX1* peaks in the  
301 vehicle control (indicated by an arrow in Fig. 3E) and at the *NOXA* gene, arguing for a spatial  
302 interaction, which is mediated by *RUNX1* (Fig. 3E, G). The dBS1 region was the only region  
303 within the CTCF boundaries where both *RUNX1* binding and DNA-DNA interaction had  
304 disappeared after AI-10-49 (Fig. 3G, SFig. 6A). This spatial interaction could also be found in

305 public Hi-C data of Panc1, K562 cells, and to a lower extent in the epithelial cell line MCF10A  
306 (Fig. 3F, SFig. 6B) (36). Taken together, these data suggest that RUNX1 binding to the *dBS1*  
307 region actively represses the *NOXA* gene. To identify which histone deacetylases are  
308 responsible for this effect, we used class I HDAC inhibitors. Here, in particular, inhibition of  
309 HDAC1/2 by Merck60 showed a significant induction of *NOXA* mRNA expression (SFig. 6C)  
310 as well as an induction of the H3K27ac mark at the *NOXA* promoter (SFig. 6D). Additionally,  
311 murine PDAC cells harboring a dual recombinase system and a 4-hydroxy-tamoxifen inducible  
312 Cre to knockout alleles for either *Hdac1* (PPT-F3641) or *Hdac2* (PPT-F1648) (SFig. 6E),  
313 displayed a *Noxa* induction only in *Hdac2* deleted cells (SFig. 6F), which is in line with a  
314 previous study showing that HDAC2 is responsible for the repression of *NOXA* in PDAC (11).  
315 Therefore, a HDAC2-RUNX1/CBF $\beta$  axis might be responsible for *NOXA* repression. This  
316 requires further validation.

317 To prove that the *dBS1* region is causative for the repression of *NOXA*, we first screened this  
318 region for evolutionary conserved *RUNX1* binding motifs, and indeed identified conserved  
319 RUNX1 consensus sequences (SFig.6G). We next performed a CRISPR/Cas9-mediated  
320 knockout of the *dBS1* region (SFig. 6H) to genetically demonstrate its involvement in *NOXA*  
321 repression. Indeed, loss of the *dBS1* region led to increased *NOXA* mRNA (Fig. 3H) and  
322 protein levels (Fig. 3I). This demonstrates the repressive function of this RUNX1 binding site.  
323 In contrast to parental cells, AI-10-49 treatment did not further affect *NOXA* expression (Fig.  
324 3H, I). Furthermore, in the *dBS1*<sup>*Δ*wt</sup> clone *NOXA* expression still was induced upon AI-10-49  
325 treatment, albeit to a lesser extent (Fig. 3H, I).

326 In summary, we describe a previously unknown mechanism of a RUNX1-mediated repression  
327 of the *NOXA* gene in PDAC. Through enrichment of an active chromatin mark at the *NOXA*  
328 gene itself, its expression is significantly increased (Fig. 3J), thereby inducing apoptosis. This  
329 mechanism could be crucial for therapeutic interventions that depend on a *NOXA*-induced cell  
330 death program.

331 **RUNX1 inhibition by AI-10-49 is effective *in vivo* and in patient derived organoids**

332 To validate whether RUNX1 inhibition could be effective *in vivo*, we first examined the efficacy  
333 of AI-10-49 in mice carrying MiaPaCa-2 PDAC xenografts (Fig. 4A). AI-10-49 treatment  
334 resulted in a significant decrease in tumor volume (Fig. 4B) and proliferative capacity (Ki67,  
335 Fig. 4C). Importantly, AI-10-49 treatment induced apoptosis measured by cleaved caspase 3  
336 (CC3) positivity in the tumor compared to the vehicle control in parental cells (Fig. 4B, C).  
337 Whereas parental cells did not change in tumor volume after AI-10-49 treatment, *NOXA*<sup>ko</sup> cells  
338 still grew upon treatment, supporting NOXA as an essential contributor of AI-10-49 efficacy  
339 (Fig. 4B). Additionally, no significant difference between control and treatment was observed  
340 in either K67 or CC3 stainings in *NOXA*<sup>ko</sup> cells (Fig. 4D). Taken together, these data indicate  
341 that apoptosis induction by AI-10-49 treatment is also dependent on NOXA *in vivo*.

342 We next isolated seven human patient-derived organoids (PDOs) from PDAC patients to  
343 investigate RUNX1 inhibition by AI-10-49. First, we performed transcriptome profiling (STable  
344 4), and sorted PDOs for high and low *NOXA* mRNA expression (Fig. 4E). Gene set enrichment  
345 analysis revealed a significant ( $q < 0.001$ ) accumulation of an apoptosis signature in the PDOs  
346 with a high *NOXA* expression (Fig. 4F). PDOs with a high *NOXA* expression showed the  
347 strongest growth inhibition towards AI-10-49 treatment, which further supports our previous  
348 findings (Fig. 4G).

349 Overall, these findings show that RUNX1 inhibition might be a novel therapeutic option to treat  
350 PDAC.

351

## 352 **Discussion**

353 Molecular tumor profiling and functional studies have led to the identification and validation of  
354 genes and signaling pathways that are dysregulated or mutated in PDAC (7, 37-39). Based on  
355 comprehensive molecular characterization of PDACs (6-9), it might thus be possible to define  
356 personalized treatment strategies (38). An imbalance of signaling pathways, such as cell  
357 death-associated pathways, promote tumor maintenance and treatment resistance in PDAC  
358 (3). In this study, we analyzed publicly available transcriptome profiles of PDAC patients and  
359 found that increased *NOXA* mRNA expression defines an aggressive squamous/quasi-

360 mesenchymal subtype. In contrast to NOXA, which is tightly regulated at the transcriptional  
361 level in PDAC (11), one of its anti-apoptotic counterparts, MCL1 (10), is mostly regulated at  
362 the protein level (40). Since *NOXA* mRNA and protein expression do not correlate strongly, as  
363 has been shown in mantle cell lymphoma (41) and in PDAC (11), it is important to identify  
364 substances that can induce apoptosis by taking advantage of a NOXA-associated vulnerability.  
365 We therefore performed drug-screening experiments in isogenic cell models with *NOXA*-  
366 deficient and *NOXA*-proficient counterparts to search for compounds that can exploit this  
367 vulnerability. We unexpectedly found a substance that inhibits the core binding alpha units  
368 RUNX1, RUNX2 or RUNX3 with CBF $\beta$ .

369 The functions of RUNX1 are highly specific depending on the tissue and cell type. Deletion of  
370 *Runx1* in a mouse model of T-cell acute lymphoblastic leukemia (T-ALL)(42), silencing of  
371 *RUNX1* in human T-ALL cells (42) and silencing of *RUNX1* in SW480 human colon cancer  
372 cells (43) all triggered apoptosis. In contrast, in Kasumi-1 t(8;21) leukemia cells RUNX1  
373 overexpression induced apoptosis by eliciting expression of the cyclin-dependent kinase  
374 inhibitor p57<sup>Kip2</sup> (44). In line with the biological effects observed in T-ALL (42) and in colon  
375 cancer cells (43), we observed an induction of apoptosis both through the pharmacological  
376 CBF $\beta$ /RUNX1 inhibition by the compound AI-10-49 and in CRISPR/Cas9 mediated knockouts  
377 of *RUNX1*. We observed a significant induction of *NOXA* mRNA expression, which was  
378 exclusive to *RUNX1* knockout cells and could not be observed in *RUNX2* or *RUNX3* knockout  
379 cells, arguing for a non-redundant function for RUNX1.

380 In a chemical high-throughput screen, which was performed to identify compounds that disrupt  
381 the interaction between RUNX1 and the CBF $\beta$ -MYH11/SMMHC fusion protein first a lead  
382 molecule was identified, which exhibited low selectivity for the fusion protein (33). Therefore,  
383 a bivalent derivate of this compound was generated. AI-10-49 inhibits CBF $\beta$ -MYH11/SMMHC  
384 with an increased selectivity and restores the formation of wild-type CBF $\beta$ -RUNX1 (33). In  
385 cells, lacking the CBF $\beta$ -MYH11/SMMHC fusion protein, AI-10-49 acts like the monomeric lead  
386 molecule and inhibits wild-type CBF $\beta$ /RUNX1. In fact, both AI-10-49 treatment as a putative  
387 pharmacological CBF $\beta$ /RUNX1 inhibitor, as well as a genetic knockout of *RUNX1*

388 unexpectedly showed an induction of NOXA, similarities in transcriptional regulation at a  
389 genome-wide scale and an associated apoptosis induction in PDAC cells, arguing for RUNX1  
390 as a repressor of *NOXA* gene expression. We could show that the pharmacological  
391 CBF $\beta$ /RUNX1 inhibition leads to a global enrichment of H3K27ac, a marker for active  
392 chromatin, including the *NOXA* gene. We observed an unexpected punctual interaction of a  
393 NOXA downstream RUNX1 binding site and the NOXA promoter. How exactly RUNX1  
394 exercises its repressive function in PDAC has to be addressed in detail in further studies. An  
395 analysis of different data sets showed a high expression of RUNX1 in pancreatic cancer  
396 compared to normal pancreas. Of note, knockdown of *RUNX1* in PDAC cells was shown to  
397 suppress the invasive/aggressive phenotype via regulation of miR-93 (45). In particular, high  
398 RUNX1 expression and RUNX1 target gene signatures were observed in premalignant  
399 Kras<sup>G12D</sup> driven murine pancreatic epithelial cells, which together indicate a largely unexplored  
400 and possibly unexploited relevance of RUNX1 in PDAC.

401 Since the apoptosis machinery in PDAC cells retains its functionality (3), the strategy of directly  
402 inhibiting pro-survival BCL2 proteins such as the NOXA antagonist MCL1 appears extremely  
403 attractive (46). One of the first selective MCL1 inhibitors with *in vivo* activity, S63845, showed  
404 massive apoptosis induction in multiple myeloma and acute myeloid leukemia, but many solid  
405 tumors were resistant to S63845 monotherapy (47). Combination therapies such as S63845  
406 with the SRC kinase inhibitor Dasatinib reduced cell viability in PDAC models and even lead  
407 to a reduction in metastasis formation (48). This data shows that the development of new  
408 therapeutic strategies, especially with regard to apoptosis evasion for PDAC, are extremely  
409 promising in improving the current clinical regimens. Whether compounds like S63845  
410 synergistically combine with AI-10-49 is currently under investigation.

411 Unraveling the transcriptional regulation of apoptosis-associated genes and the interplay of  
412 transcription factors, such as RUNX1, is important to understand the tumor biology of PDAC.  
413 The development and improvement of compounds that can inhibit transcription factors, such  
414 as the CBF $\beta$ /RUNX1 inhibitor used here, perhaps in combination with proteolysis-targeting  
415 chimeras (PROTAC) technology (49), could provide new approaches for PDAC treatment.



416 Therefore, our mechanistic work, demonstrating a control of NOXA by a repressive facet of  
417 RUNX1 opens a novel research direction into potent RUNX1 inhibitors and a novel way to  
418 target this deadly disease.

419

## 420 **Acknowledgements**

421 We thank Martin Schlensog and Yakup Yasar for performing the IHC staining. We thank Dieter  
422 Saur for providing murine PDAC cell lines and thank Ernesto Acevedo for providing the  
423 p53(1C12) antibody. Funding: Else-Kröner-Fresenius Stiftung (2016\_A43 to M.W.); Walter  
424 Schulz Stiftung to M.W.; Deutsche Forschungsgemeinschaft (DFG) [SFB1321 (Project-  
425 ID 329628492) C13 to G.S. and SCHN 959/6-1 and SCHN 959/3-2 to G.S.] and SFB 1335  
426 project P3 to U.K.; Wilhelm-Sander-Stiftung (2017.048.2 to G.S. and U.K.); Deutsche  
427 Krebshilfe project 70114425 to U.K.; Stiftung Charité to U.K..

## 428 **Conflict of Interest**

429 The authors declare no competing interests.

## 430 **Availability of Data and Materials**

431 RNAseq (cell lines), ChIPseq, ATACseq and 4C accession No.: PRJEB39828. RNAseq  
432 (organoids) gene expression matrix is shown in the STable 4.

433

## 434 **References**

- 435 1. R. L. Siegel, K. D. Miller, A. Jemal, Cancer statistics, 2020. *CA Cancer J Clin* **70**, 7-30  
436 (2020).
- 437 2. D. Hanahan, R. A. Weinberg, Hallmarks of cancer: the next generation. *Cell* **144**,  
438 646-674 (2011).
- 439 3. R. Hamacher, R. M. Schmid, D. Saur, G. Schneider, Apoptotic pathways in pancreatic  
440 ductal adenocarcinoma. *Mol Cancer* **7**, 64 (2008).

- 441 4. J. E. Bradner, D. Hnisz, R. A. Young, Transcriptional Addiction in Cancer. *Cell* **168**,  
442 629-643 (2017).
- 443 5. Y. Cheng *et al.*, Targeting epigenetic regulators for cancer therapy: mechanisms and  
444 advances in clinical trials. *Signal Transduct Target Ther* **4**, 62 (2019).
- 445 6. P. Bailey *et al.*, Genomic analyses identify molecular subtypes of pancreatic cancer.  
446 *Nature* **531**, 47-52 (2016).
- 447 7. E. A. Collisson, P. Bailey, D. K. Chang, A. V. Biankin, Molecular subtypes of  
448 pancreatic cancer. *Nat Rev Gastroenterol Hepatol* **16**, 207-220 (2019).
- 449 8. E. A. Collisson *et al.*, Subtypes of pancreatic ductal adenocarcinoma and their  
450 differing responses to therapy. *Nat Med* **17**, 500-503 (2011).
- 451 9. R. A. Moffitt *et al.*, Virtual microdissection identifies distinct tumor- and stroma-specific  
452 subtypes of pancreatic ductal adenocarcinoma. *Nat Genet* **47**, 1168-1178 (2015).
- 453 10. A. Strasser, S. Cory, J. M. Adams, Deciphering the rules of programmed cell death to  
454 improve therapy of cancer and other diseases. *EMBO J* **30**, 3667-3683 (2011).
- 455 11. P. Fritsche *et al.*, HDAC2 mediates therapeutic resistance of pancreatic cancer cells  
456 via the BH3-only protein NOXA. *Gut* **58**, 1399-1409 (2009).
- 457 12. M. Wirth *et al.*, MYC and EGR1 synergize to trigger tumor cell death by controlling  
458 NOXA and BIM transcription upon treatment with the proteasome inhibitor  
459 bortezomib. *Nucleic Acids Res* **42**, 10433-10447 (2014).
- 460 13. K. Lankes *et al.*, Targeting the ubiquitin-proteasome system in a pancreatic cancer  
461 subtype with hyperactive MYC. *Mol Oncol* **14**, 3048-3064 (2020).
- 462 14. E. Oda *et al.*, Noxa, a BH3-only member of the Bcl-2 family and candidate mediator of  
463 p53-induced apoptosis. *Science* **288**, 1053-1058 (2000).
- 464 15. C. Ploner, R. Kofler, A. Villunger, Noxa: at the tip of the balance between life and  
465 death. *Oncogene* **27 Suppl 1**, S84-92 (2008).
- 466 16. L. S. Chuang, K. Ito, Y. Ito, RUNX family: Regulation and diversification of roles  
467 through interacting proteins. *Int J Cancer* **132**, 1260-1271 (2013).

- 468 17. B. A. Otalora-Otalora, B. Henriquez, L. Lopez-Kleine, A. Rojas, RUNX family:  
469 Oncogenes or tumor suppressors (Review). *Oncol Rep* **42**, 3-19 (2019).
- 470 18. M. Ichikawa *et al.*, AML-1 is required for megakaryocytic maturation and lymphocytic  
471 differentiation, but not for maintenance of hematopoietic stem cells in adult  
472 hematopoiesis. *Nat Med* **10**, 299-304 (2004).
- 473 19. Y. Lou *et al.*, A Runx2 threshold for the cleidocranial dysplasia phenotype. *Hum Mol*  
474 *Genet* **18**, 556-568 (2009).
- 475 20. H. Fukamachi, K. Ito, Growth regulation of gastric epithelial cells by Runx3.  
476 *Oncogene* **23**, 4330-4335 (2004).
- 477 21. K. Inoue *et al.*, Runx3 controls the axonal projection of proprioceptive dorsal root  
478 ganglion neurons. *Nat Neurosci* **5**, 946-954 (2002).
- 479 22. R. Mevel, J. E. Draper, A. L. M. Lie, V. Kouskoff, G. Lacaud, RUNX transcription  
480 factors: orchestrators of development. *Development* **146** (2019).
- 481 23. M. Uhlen *et al.*, A pathology atlas of the human cancer transcriptome. *Science* **357**  
482 (2017).
- 483 24. K. Shigesada, B. van de Sluis, P. P. Liu, Mechanism of leukemogenesis by the  
484 inv(16) chimeric gene CBFβ/PEBP2B-MHY11. *Oncogene* **23**, 4297-4307 (2004).
- 485 25. C. J. Scheitz, T. S. Lee, D. J. McDermitt, T. Tumber, Defining a tissue stem cell-  
486 driven Runx1/Stat3 signalling axis in epithelial cancer. *EMBO J* **31**, 4124-4139  
487 (2012).
- 488 26. D. J. Birnbaum *et al.*, Expression of Genes with Copy Number Alterations and  
489 Survival of Patients with Pancreatic Adenocarcinoma. *Cancer Genomics Proteomics*  
490 **13**, 191-200 (2016).
- 491 27. C. J. Scheitz, T. Tumber, New insights into the role of Runx1 in epithelial stem cell  
492 biology and pathology. *J Cell Biochem* **114**, 985-993 (2013).
- 493 28. I. Kitabayashi, A. Yokoyama, K. Shimizu, M. Ohki, Interaction and functional  
494 cooperation of the leukemia-associated factors AML1 and p300 in myeloid cell  
495 differentiation. *EMBO J* **17**, 2994-3004 (1998).

- 496 29. X. Zhao *et al.*, Methylation of RUNX1 by PRMT1 abrogates SIN3A binding and  
497 potentiates its transcriptional activity. *Genes Dev* **22**, 640-653 (2008).
- 498 30. Z. Sheng, S. Z. Wang, M. R. Green, Transcription and signalling pathways involved in  
499 BCR-ABL-mediated misregulation of 24p3 and 24p3R. *EMBO J* **28**, 866-876 (2009).
- 500 31. M. Chan-Seng-Yue *et al.*, Transcription phenotypes of pancreatic cancer are driven  
501 by genomic events during tumor evolution. *Nat Genet* **52**, 231-240 (2020).
- 502 32. J. A. Pulikkan *et al.*, CBFbeta-SMMHC Inhibition Triggers Apoptosis by Disrupting  
503 MYC Chromatin Dynamics in Acute Myeloid Leukemia. *Cell* **174**, 172-186 e121  
504 (2018).
- 505 33. A. Illendula *et al.*, Chemical biology. A small-molecule inhibitor of the aberrant  
506 transcription factor CBFbeta-SMMHC delays leukemia in mice. *Science* **347**, 779-784  
507 (2015).
- 508 34. D. Gfeller *et al.*, SwissTargetPrediction: a web server for target prediction of bioactive  
509 small molecules. *Nucleic Acids Res* **42**, W32-38 (2014).
- 510 35. D. Wu, T. Ozaki, Y. Yoshihara, N. Kubo, A. Nakagawara, Runt-related transcription  
511 factor 1 (RUNX1) stimulates tumor suppressor p53 protein in response to DNA  
512 damage through complex formation and acetylation. *J Biol Chem* **288**, 1353-1364  
513 (2013).
- 514 36. E. P. Consortium, An integrated encyclopedia of DNA elements in the human  
515 genome. *Nature* **489**, 57-74 (2012).
- 516 37. M. Orth *et al.*, Pancreatic ductal adenocarcinoma: biological hallmarks, current status,  
517 and future perspectives of combined modality treatment approaches. *Radiat Oncol*  
518 **14**, 141 (2019).
- 519 38. C. Torres, P. J. Grippo, Pancreatic cancer subtypes: a roadmap for precision  
520 medicine. *Ann Med* **50**, 277-287 (2018).
- 521 39. A. Biederstadt *et al.*, SUMO pathway inhibition targets an aggressive pancreatic  
522 cancer subtype. *Gut* **69**, 1472-1482 (2020).

- 523 40. R. M. Fritsch, G. Schneider, D. Saur, M. Scheibel, R. M. Schmid, Translational  
524 repression of MCL-1 couples stress-induced eIF2 alpha phosphorylation to  
525 mitochondrial apoptosis initiation. *J Biol Chem* **282**, 22551-22562 (2007).
- 526 41. M. A. Dengler *et al.*, Discrepant NOXA (PMAIP1) transcript and NOXA protein levels:  
527 a potential Achilles' heel in mantle cell lymphoma. *Cell Death Dis* **5**, e1013 (2014).
- 528 42. A. Choi *et al.*, RUNX1 is required for oncogenic Myb and Myc enhancer activity in T-  
529 cell acute lymphoblastic leukemia. *Blood* **130**, 1722-1733 (2017).
- 530 43. Y. Zhou *et al.*, LRG1 promotes proliferation and inhibits apoptosis in colorectal cancer  
531 cells via RUNX1 activation. *PLoS One* **12**, e0175122 (2017).
- 532 44. S. Liu *et al.*, RUNX1 inhibits proliferation and induces apoptosis of t(8;21) leukemia  
533 cells via KLF4-mediated transactivation of P57. *Haematologica* **104**, 1597-1607  
534 (2019).
- 535 45. Y. Cheng *et al.*, RUNX1 promote invasiveness in pancreatic ductal adenocarcinoma  
536 through regulating miR-93. *Oncotarget* **8**, 99567-99579 (2017).
- 537 46. S. H. Wei *et al.*, Inducing apoptosis and enhancing chemosensitivity to gemcitabine  
538 via RNA interference targeting Mcl-1 gene in pancreatic carcinoma cell. *Cancer*  
539 *Chemother Pharmacol* **62**, 1055-1064 (2008).
- 540 47. A. Kotschy *et al.*, The MCL1 inhibitor S63845 is tolerable and effective in diverse  
541 cancer models. *Nature* **538**, 477-482 (2016).
- 542 48. L. Castillo *et al.*, MCL-1 antagonism enhances the anti-invasive effects of dasatinib in  
543 pancreatic adenocarcinoma. *Oncogene* **39**, 1821-1829 (2020).
- 544 49. X. Sun *et al.*, PROTACs: great opportunities for academia and industry. *Signal*  
545 *Transduct Target Ther* **4**, 64 (2019).
- 546 50. C. D. Logsdon *et al.*, Molecular profiling of pancreatic adenocarcinoma and chronic  
547 pancreatitis identifies multiple genes differentially regulated in pancreatic cancer.  
548 *Cancer Res* **63**, 2649-2657 (2003).
- 549 51. M. Uhlen *et al.*, Proteomics. Tissue-based map of the human proteome. *Science* **347**,  
550 1260419 (2015).

551 52. D. Alonso-Curbelo *et al.*, A gene-environment-induced epigenetic program initiates  
552 tumorigenesis. *Nature* **590**, 642-648 (2021).

553

## 554 **Figure Legends**

555 **Figure 1** *Screening for NOXA associated vulnerabilities in PDAC cells*

556 **A)** Cluster analysis of mRNA from classical BH3-only proteins, derived from transcriptome  
557 profiles of PDAC patients (6). Molecular subtypes have been divided into two groups: the  
558 aggressive squamous subtype and all other subtypes have been merged to others. Histological  
559 Subtypes are indicated. Upper and lower quartiles of indicated mRNAs were identified.  
560 Significant (Fisher exact test) frequencies of a high mRNA expression of the indicated genes  
561 (upper quartile) in the squamous subtype are indicated (\* $p < 0.05$ , \*\* $p < 0.01$ , \*\*\* $p < 0.001$ ). **B)**  
562 Survival of PDAC patients with a low (lower quartile) and a high (upper quartile) *NOXA* mRNA  
563 expression, derived from the dataset described in A)(6). Log rank test:  $p = 0.006$ . **C)** Western  
564 blot analysis of *NOXA* protein in PSN1 and MiaPaCa-2 parental and isogenic *NOXA*<sup>ko</sup> cell  
565 lines. Vinculin served as loading control. **D)** Growth curves of PSN1 and MiaPaCa-2 parental  
566 and isogenic *NOXA*<sup>ko</sup> cell lines performed with live-cell imaging. 5 pictures per well were taken  
567 every 8 h and growth was calculated as confluence (%) normalized to 0 h control. **E)** Schematic  
568 representation of the performed high throughput drug screening strategy. 4 human pancreatic  
569 cancer cell lines (2 parental and 2 *NOXA*<sup>ko</sup>) and 4 murine cell lines (2 parental and 2 *NOXA*<sup>ko</sup>)  
570 were used for screening a total of 1842 drugs. These compounds were added to each cell line  
571 24 h after seeding at a concentration of 600 nM and cell viability was measured by MTT assay  
572 after 72 h.  $n = 3$ ; all biological replicates were performed as technical triplicates. The inhibitors  
573 that differentially reduced viability in parental cell lines up to 10% more in comparison to  
574 *NOXA*<sup>ko</sup> cells were further followed. Based on target treatment and or/novelty, 12 drugs were  
575 selected out of the first 50 hits. The  $GI_{50}$  of the drugs for murine and human cell lines was  
576 calculated from dose-response treatment using MTT assay. **F)** Dose-response treatment in 8  
577 human and murine pancreatic cancer cell lines (4 parental, 4 *NOXA*<sup>ko</sup>). The fold change of the

578  $GI_{50}$  of the knockout cell lines compared to the parental is depicted. n=3; all biological replicates  
579 were performed as technical triplicates. Red represents sensitivity in parental cell line in  
580 respect to its isogenic counterpart (smaller  $GI_{50}$ ). Blue stands for higher sensitivity in the  
581 knockout cell line. R= resistant cell line within the used doses. Dose-response inhibition was  
582 calculated with logarithmic regression and tested for significance with logit model (\* $p<0.05$ ,  
583 \*\* $p<0.01$ , \*\*\* $p<0.001$ ). **G)** FACS analysis of Annexin V/PI stained parental and  $NOXA^{ko}$  and  
584 cells after 72 h treatment with 3 $\mu$ M AI-10-49 (++) or DMSO (-) as vehicle control. n=3; all  
585 biological replicates were performed as technical triplicates. p value of unpaired t-test  
586 \*\*\* $p<0.001$ . **H)** Western blot analysis of NOXA and MCL1 proteins in pancreatic cancer cell  
587 lines upon 6 h AI-10-49 treatment. Representative Western blot is shown. Vinculin served as  
588 loading control. n=3; all biological replicates were performed as technical triplicates. (-) DMSO,  
589 (+) 1.5  $\mu$ M AI-10-49, (++) 3  $\mu$ M AI-10-49. **I)** qPCR of NOXA in PSN1 and MiaPaCa-2 cell lines.  
590 Conditions as described in H).

591 **Figure 2** *RUNX1 is upregulated in pancreatic cancer and a genetic RUNX1 deletion induces*  
592 *NOXA transcription and apoptosis*

593 **A)** qPCR of NOXA in parental,  $RUNX1^{ko}$ ,  $RUNX2^{ko}$  and  $RUNX3^{ko}$  MiaPaCa-2 cells. mRNA fold  
594 change was calculated in comparison to parental cell line. n=3; all biological replicates were  
595 performed as technical triplicates. **B)** Western blot analysis and quantification of NOXA and  
596 RUNX1 proteins in parental,  $NOXA^{ko}$  and  $RUNX1^{ko}$  MiaPaCa-2 cells. Tubulin and actin served  
597 as loading controls. \* unspecific band. P value of t-test,  $p<0.05$ . **C)** Representative image and  
598 quantification of clonogenic assay in parental and  $RUNX1^{ko}$  cells. n=3; all biological replicates  
599 were performed as technical triplicates. P value of t-test,  $p<0.05$ . **D)** FACS analysis of  
600 Annexin V stained parental and  $RUNX1^{ko}$  MiaPaCa-2 cells. n=3; all biological replicates were  
601 performed as technical triplicates. P value of t-test,  $p<0.01$ . **E)**  $RUNX1$  mRNA expression of  
602 patient samples from normal pancreas and pancreatic cancer (50), accessed via the  
603 oncomine.org,  $p<0.01$ . **F)** IHC of patient samples from normal pancreas and pancreatic cancer  
604 accessed via the human protein atlas (51). **G)**  $RUNX1$  mRNA expression of mouse samples

605 from normal pancreatic epithelial cells and Kras<sup>G12D</sup> pancreatic epithelial cells , p<0.0001. **H)**  
606 Gene set enrichment analysis (GSEA) of dataset, described in (52) F).

607 **Figure 3** *RUNX1 inhibition induces a global redistribution of active chromatin and activates of*  
608 *the proximal promotor region of the NOXA gene*

609 **A)** Volcano Plot of differential expressed genes. MiaPaCa-2 cells were treated with vehicle  
610 (DMSO) or AI-10-49 (3 $\mu$ M) for 6 h (n=3 biological replicates). **B)** Indicated gene signatures of  
611 a GSEA from RNAseq data, described in A). GSEA, gene set enrichment analysis. **C)** Heatmap  
612 representing open chromatin peaks by omni-ATAC-seq analysis in DMSO and AI-10-49  
613 treated cells (3 $\mu$ M for 6h) and in parental and *RUNX1*<sup>ko</sup> MiaPaCa-2 cells (n=2). **D)** Heatmap  
614 representing H3K27ac peaks in MiaPaCa-2 cells treated for 6 h with vehicle (DMSO) or 3  $\mu$ M  
615 AI-10-49 (n=2). Venn diagram displays H3K27ac peaks in AI-10-49 and vehicle treated  
616 MiaPaCa-2 cells. H3K27ac peak distribution over genomic features are displayed in a bar plot  
617 diagram. **E)** Omni-ATACseq (DNA accessibility) (n=2), chromosome conformation capture  
618 (4C, spatial chromatin organisation) (n=1) and ChIPseq (n=2) analysis for RUNX1, H3K27ac  
619 and CTCF in vehicle (DMSO)- or AI-10-49 treated MiaPaCa-2 cells. Arrows indicate either  
620 RUNX1 binding and an interaction of the *NOXA* gene at downstream binding site 1 (dBS1). **F)**  
621 ChIP-qPCR analysis at the promoter and the downstream binding site 1 (dBS1) for RUNX1,  
622 H3K27ac and IgG in DMSO- or AI-10-49 treated MiaPaCa-2 cells (n=3). **G)** Heatmap of Hi-C  
623 data from Panc1 cells generated by Dekker laboratory (36), accessed via  
624 <http://3dgenome.fsm.northwestern.edu/> displaying spatial chromatin organization. **H)** Relative  
625 *NOXA* mRNA expression in indicated clones of MiaPaCa-2 cells. The dBS1 binding site was  
626 excised using CRISPR/Cas9. Cells were treated for 6h with 3 $\mu$ M of AI-10-49. **I)** Western blot  
627 of *NOXA* 6h upon treatment with 3 $\mu$ M AI-10-49 in indicated clones of MiaPaCa-2 cells. Actin  
628 served as loading control. **J)** Schematic of RUNX1 mediated repression of the *NOXA* gene.

629 **Figure 4** *Tumor growth is blocked by RUNX1 inhibition in vivo and in patient derived organoids.*

630 **A)** Mice were treated with 200 mg/kg AI-10-49 intra peritoneal daily for 9 days. Treatment  
631 started (d1) when tumors reached a volume of 0.2 cm<sup>3</sup>. **B)** Tumor size was measured over



632 time in parental and *NOXA*<sup>ko</sup> xenografts. AI-10-49 treated mice showed a significant tumor  
633 growth inhibition (n=5 mice in each group). \*\*p<0.01, \*\*\*p<0.001 (Student's t-Test) **C**) IHC of  
634 parental xenografts. Left panel: Representative pictures of tumors from AI-10-49 and vehicle  
635 treated mice. Displayed are full scans of the tumors (bar: 2mm); detailed pictures of H&E  
636 stained and IHC for Ki67 and cleaved caspase 3 (CC3, bar: 100µm). Right panel:  
637 Quantification of Ki67 and CC3 IHC staining of AI-10-49 treated tumor xenografts using the  
638 Aperio positive pixel method. \* p < 0.055, \*\* p < 0.01 (t-test). **D**) IHC of *NOXA*<sup>ko</sup> xenografts as  
639 indicated in C). **E**) RNA-seq data of 7 patient derived organoids (PDOs) were analyzed for  
640 *NOXA* expression. *NOXA* mRNA expression > 75% = *NOXA*<sup>high</sup>; *NOXA* mRNA expression <  
641 25% = *NOXA*<sup>low</sup>. **F**) GSEA of RNA-seq data of PDOs. Hallmark apoptosis signature in the  
642 *NOXA*<sup>high</sup> subtype. Nominal p-value < 0.001. FDR-q value is depicted. GSEA, gene set  
643 enrichment analysis. **G**) Dose-response treatment of PDOs viability measured after 72h upon  
644 AI-10-49 treatment with CellTiterGlo®.

## 645 **Supplements**

646 **SFigure 1** Classical BH3 only mRNA expression and survival analysis in PDAC

647 **A**) mRNA expression of BH3-only differentially expressed in PDAC subtypes classified in  
648 squamous and other. Fisher's exact test, \* p < 0.01, \*\* p < 0.001, \*\*\* p < 0.0001. **B**) Simple  
649 Cox Regression models were constructed using the expression of all "classical BH3 family  
650 members". Genes with p-values < 0.1 were used to construct a multiple Cox regression model.  
651 Out of all members, only *NOXA* significantly correlated with inferior survival (HR = 1.9, p <  
652 0.001), while increasing expression of *BBC3/PUMA* was associated with higher overall survival  
653 ((HR = 0.73, p = 0.095). **C**) Survival of PDAC patients with a low (lower quartile) and a high  
654 (upper quartile) *NOXA* mRNA expression derived from curated TCGA datasets of PDAC  
655 patients as described (13). Log rank test as indicated. **D**) Human PDAC cell line subtypes  
656 according to Collisson et al. (8). QM: quasi-mesenchymal.

657 **SFigure 2** CRISPR/Cas9 knockout and CRISPRa strategies and co-immunoprecipitation of  
658 *RUNX1* and *CBFb* in AI-10-49 treated *MiaPaCa-2* cells

659 **A)** Scheme of the human *NOXA* gene (parental and knockout) with indicated primer binding  
660 sites. **B)** Genotyping PCR of indicated human PDAC cells to screen for a *NOXA* knockout. **C)**  
661 Scheme of the murine *NOXA* gene (parental and knockout) with indicated primer binding sites.  
662 **D)** Genotyping PCR of indicated murine PDAC cells to screen for a *NOXA* knockout. **E)** Co-  
663 immunoprecipitation of RUNX1 and CBF $\beta$  in MiaPaCa-2 cells. Cells were treated for 6h with  
664 3 $\mu$ M of AI-10-49 or DMSO as vehicle control. Either a RUNX1 or a CBF $\beta$  antibody was used  
665 for the Co-IP as indicated. An IgG pulldown was used as negative control. **F)** Schematic  
666 representation of dCas9-VP64-MS2-HSF1 driven *NOXA* overexpression. One sgRNA drives  
667 dCas9 towards the *NOXA* promoter region to induce its expression. **G)** Schematic  
668 representation of RUNX gene family knockout. For RUNX1 knockout, 2 sgRNAs were  
669 designed to excise the gene region from exon 3 to exon 4. For RUNX2 knockout, 2 sgRNAs  
670 were designed to target excision of beginning of exon 8 until stop codon. For RUNX3 knockout,  
671 2 sgRNAs target upstream exon 1 and end of exon 2.

672 **SFigure 3** *RUNX1 inhibition by AI-10-49 induces NOXA associated apoptosis*

673 **A)** Western blot analysis of indicated BCL2 family members and cleaved PARP upon 6h and  
674 24h treatment with 3 $\mu$ M of AI-10-49 in MiaPaCa-2 and PSN1 cells. Actin served as loading  
675 control. **B)** Protein expression analysis of MCL1, p53, BCL-xL, BIM and BAX upon 24h and  
676 72h treatment with 3 $\mu$ M of AI-10-49 and the pan-caspase inhibitor zVAD-FMK in parental and  
677 *NOXA*<sup>ko</sup> MiaPaCa-2 cells. GAPDH served as loading control. **C)** p53 Western Blot of indicated  
678 murine PDAC cell lines to determine basal p53 expression of n=3 biological replicates. Actin  
679 served as loading control. **D)** Relative *Noxa* mRNA expression in murine PDAC cells harboring  
680 wild type p53 (PPT-5123), mutant p53 (PPT-5436) and deleted p53 (PPT-6554 and PPT-W22).  
681 Cells were treated for 6h with 12.5 $\mu$ g/ml Etoposide, 3 $\mu$ M AI-10-49 and DMSO as vehicle  
682 control. Actin served as housekeeping gene. **E)** Western blot of RUNX1 and p63 $\alpha$  upon 6, 24  
683 and 48h treatment with 3 $\mu$ M of AI-10-49 in parental and *NOXA*<sup>ko</sup> MiaPaCa-2 cells and parental  
684 PSN1 cells. GAPDH served as loading control. **F)** AnnexinV/PI FACS of parental and *NOXA*<sup>ko</sup>  
685 MiaPaCa-2 cells upon 24h treatment with 3 $\mu$ M AI-10-49 and 50 $\mu$ M zVAD-FMK. Upper panel:

686 AnnexinV<sup>+</sup>/PI<sup>+</sup> fraction. Lower panel: Annexin V<sup>+</sup>/PI<sup>+</sup> fraction. **G)** Western blot of NOXA protein  
687 in MiaPaCa-2 cells. Vinculin served as loading control. **H)** Representative image of clonogenic  
688 assay in MiaPaCa-2 parental and NOXA-CRISPR-dCas9-VP64-MS2-HSF1-mediated  
689 activation (NOXA-CRISPRa). Cells were treated for 3 weeks with vehicle (DMSO) or 400 nM  
690 AI-10-49. n=4; all biological replicates were performed as technical triplicates. **I)** Quantification  
691 of clonogenic assay in parental and NOXA-CRISPRa. Each treatment was quantified and  
692 normalized against its DMSO control. Depicted is the number of colonies in % per treatment  
693 compared to vehicle. P value of ANOVA test \*\*\*p<0.001.

694 **SFigure 4** *RUNX1 is upregulated in pancreatic cancer and suppresses apoptosis via NOXA*  
695 *repression*

696 **A)** Relative *RUNX1* and *NOXA* expression in MiaPaCa-2, Panc-1 and AsPC1 cells upon  
697 treatment with a pool of specific siRNAs targeting *RUNX1*. Cells were treated for 72h with  
698 either scrambled siRNAs (Ctrl) or *RUNX1* specific siRNAs. Actin was used as housekeeping  
699 gene ( $\Delta\Delta Ct$ ). **B)** GI50 values generated in viability assays using CellTiterGlo in parental,  
700 *RUNX1*ko and cells, determined 72h after AI-10-49 treatment. In addition cells were treated  
701 48h with siRNA (Ctrl and *RUNX1*) and treated for additional 72 h with AI-10-49. **C)** *RUNX1*  
702 mRNA expression of patient samples from normal pancreas and pancreatic cancer GEO  
703 accession no. GSE15471, GSE16515 **D)** Pearson correlation (incl. linear regression with 95%  
704 confidence bands) of PDAC patient samples from the squamous subtype (6) and from  
705 microdissected PDAC patient samples (8). **E)** Western blot of *RUNX1* and *NOXA* in parental  
706 and *RUNX1*<sup>ko</sup> MiaPaCa-2 cells. *RUNX1*<sup>ko</sup> cells were stably transduced with either a control  
707 shRNA or a *NOXA* specific shRNA. Actin served as loading control. **F)** Annexin V FACS  
708 analysis of cells as indicated in E).

709 **SFigure 5** *Quality assessment of H3K27ac ChIP-seq.*

710 **A)** Fingerprint plot of all replicates including the input controls. Samples with uniform  
711 distribution across the genome (e.g. input controls) should plot across the diagonal line, while  
712 samples with enrichment across small genomic regions show a steep rise towards the end of

713 the plot. **B)** Correlation plot calculated using the Spearman coefficient quantified by the  
714 horizontal bar at the bottom of the plot. **C)** Average signal profile across peaks calculated with  
715 macs2 callpeak. The profile was generated with ChIPQC.

716 **SFigure 6** *RUNX1 suppresses NOXA via the dBS1 downstream enhancer in PDAC cells*

717 **A)** Chromosome conformation capture (4C, spatial chromatin organisation) and ChIPseq  
718 analysis for RUNX1 in indicated cell lines. MiaPaCa-2 cells were treated with vehicle (DMSO)-  
719 or 3 $\mu$ M AI-10-49 for 6h. RUNX1 ChIPseq of MCF10A breast epithelial cells (GSE121370) and  
720 K562 CML cells (GSE96253) are displayed. The NOXA downstream binding site 1 (dBS1) is  
721 depicted. **B)** Heatmap of Hi-C data from K562 and MCF10A cells accessed via  
722 <http://3dgenome.fsm.northwestern.edu/> displaying spatial chromatin organization. **C)** Relative  
723 NOXA mRNA expression in MiaPaCa-2 and PSN1 cells. Cells were treated with 4 $\mu$ M  
724 Entinostat, 10 $\mu$ M Merck60 and 10 $\mu$ M RGFP966 for 24h. Expression was determined by  $\Delta\Delta$ Ct  
725 method. Actin served as housekeeping control. **D)** ChIP-qPCR analysis at the NOXA promoter  
726 for H3K27ac and IgG in DMSO- or Merck60 treated MiaPaCa-2 cells. **E)** Western Blot of  
727 HDAC1, HDAC2 and HDAC3 in murine PDAC cells harboring a dual recombination system.  
728 600 nM 4-Hydroxytamoxifen (4-OHT) treatment induced CreERT2 shuttling and excision of  
729 either Hdac1 (PPT-F3641) or Hdac2 (PPT-F1648). Actin served as loading control. **F)** Relative  
730 *Noxa* mRNA expression in murine PPT-F3641 and PPT-F1648 cells. Cells were treated with  
731 600nM 4-OHT for 48h. Actin served as housekeeping control. **G)** Sequence analysis using  
732 ConTra v3 to identify conserved RUNX1 consensus sequences (as indicated) in the dBS1  
733 region. **H)** Upper Panel: Scheme of the human dBS1 region (parental and knockout) with  
734 indicated primer binding sites. Lower Panel: Genotyping PCR of MiaPaCa-2 cells to screen for  
735 a dBS1 knockout. wt: wildtype; ko: knockout.

736 **STable 1** *Mean fold change of drug hits from drug screening experiment*

737 **STable 2** *SwissTargetPrediction of AI-10-49*

738 **STable 3** *Enriched gene sets of AI-10-49 versus vehicle control treated MiaPaCa-2 cells*

739 **STable 4** *PDO Gene Expression Matrix*

740 **STable 5** *Primer sequences, sgRNAs, Antibodies, murine cell lines*

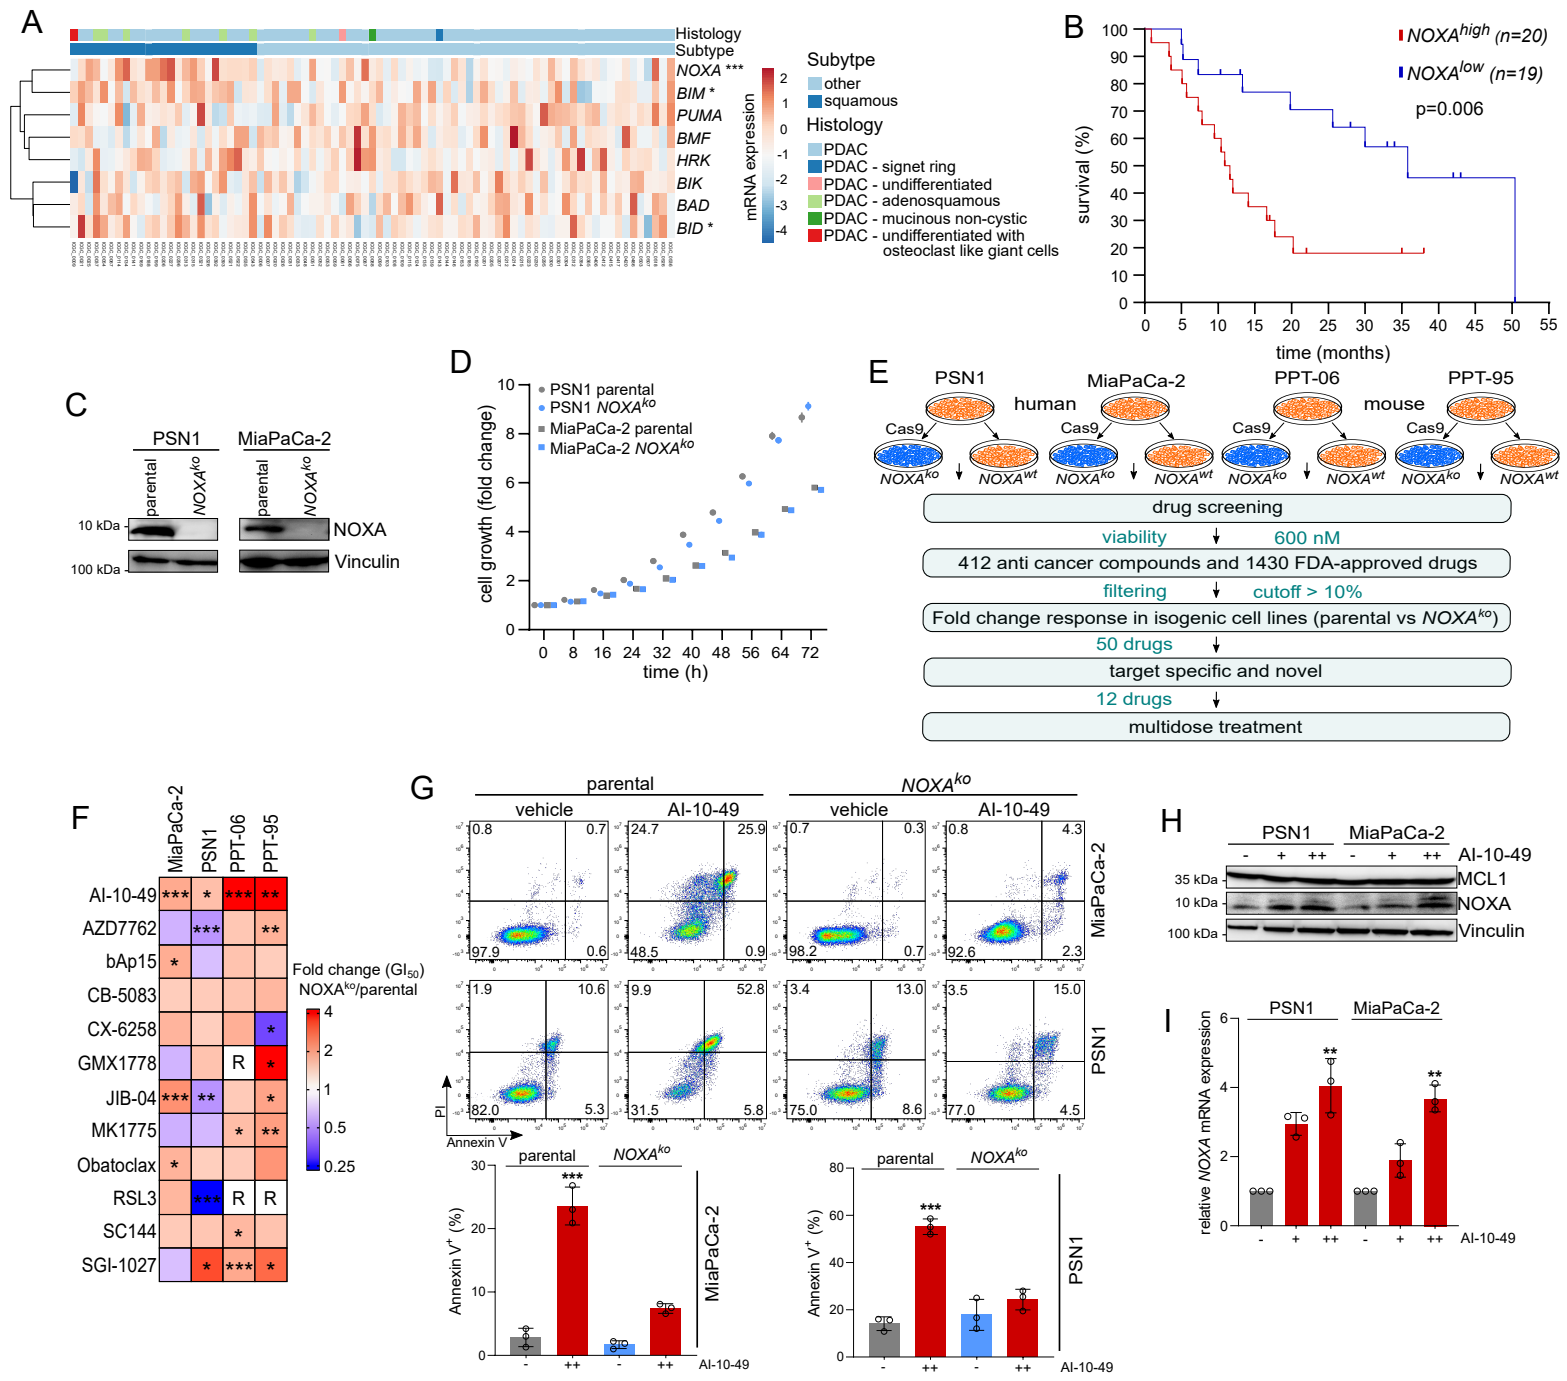

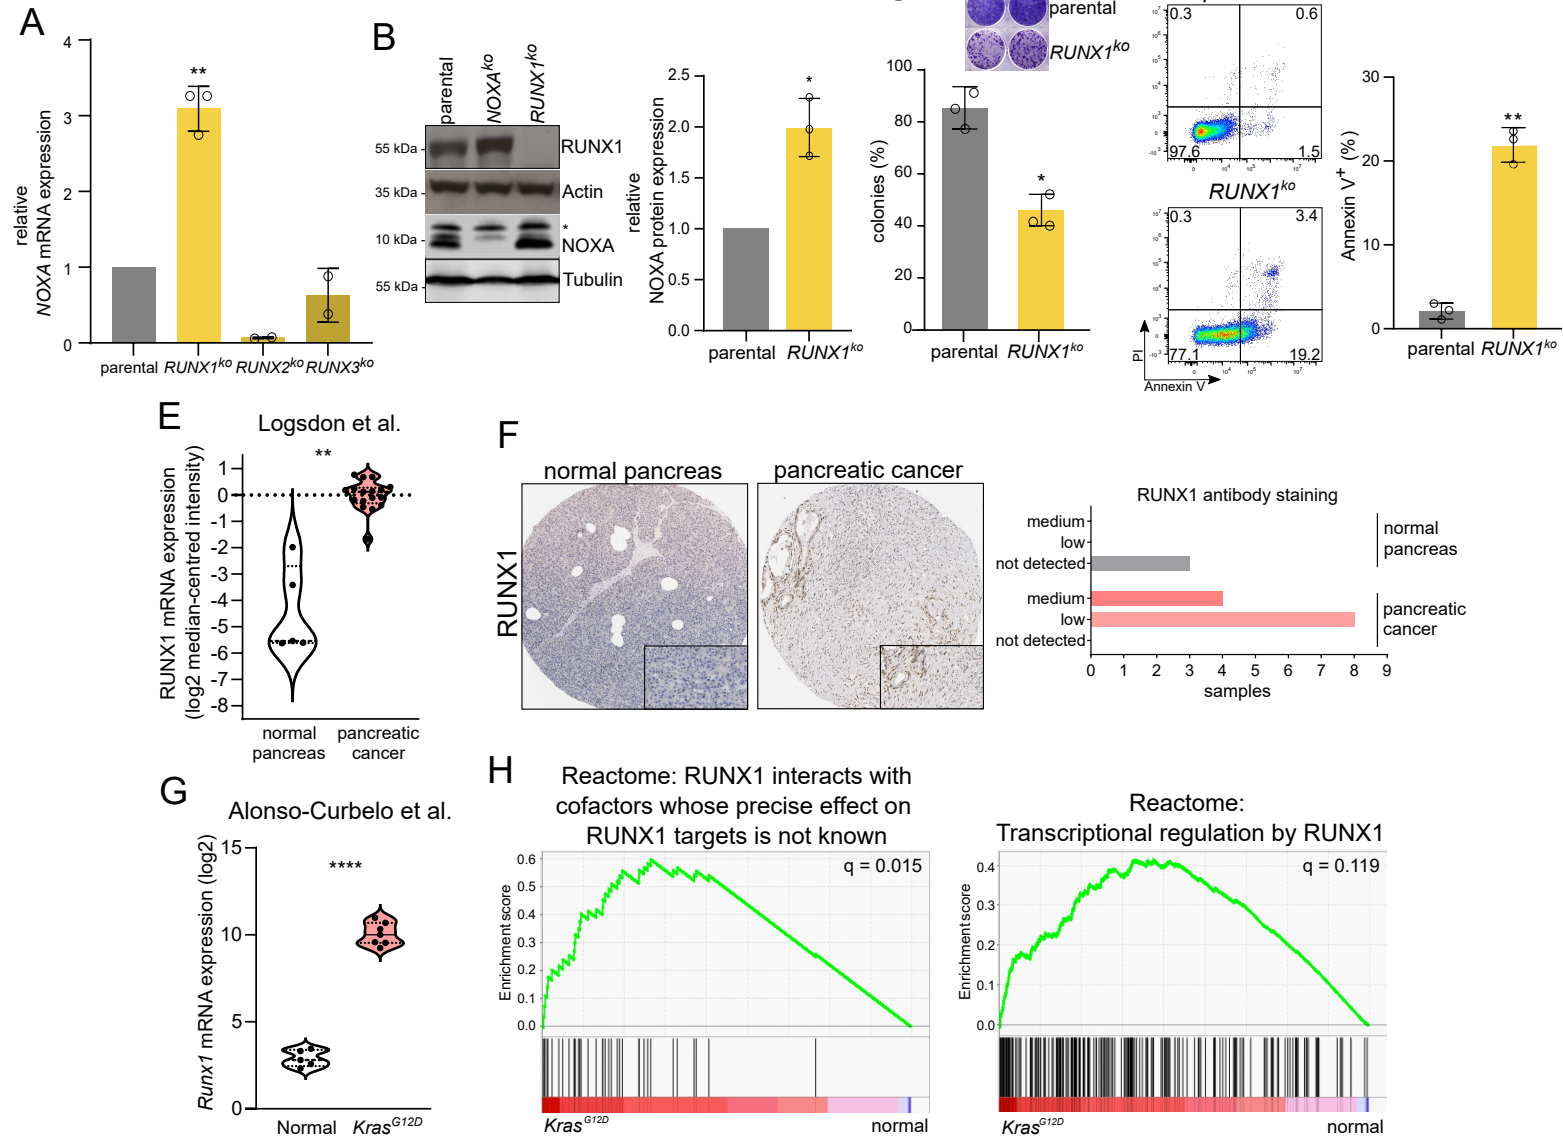

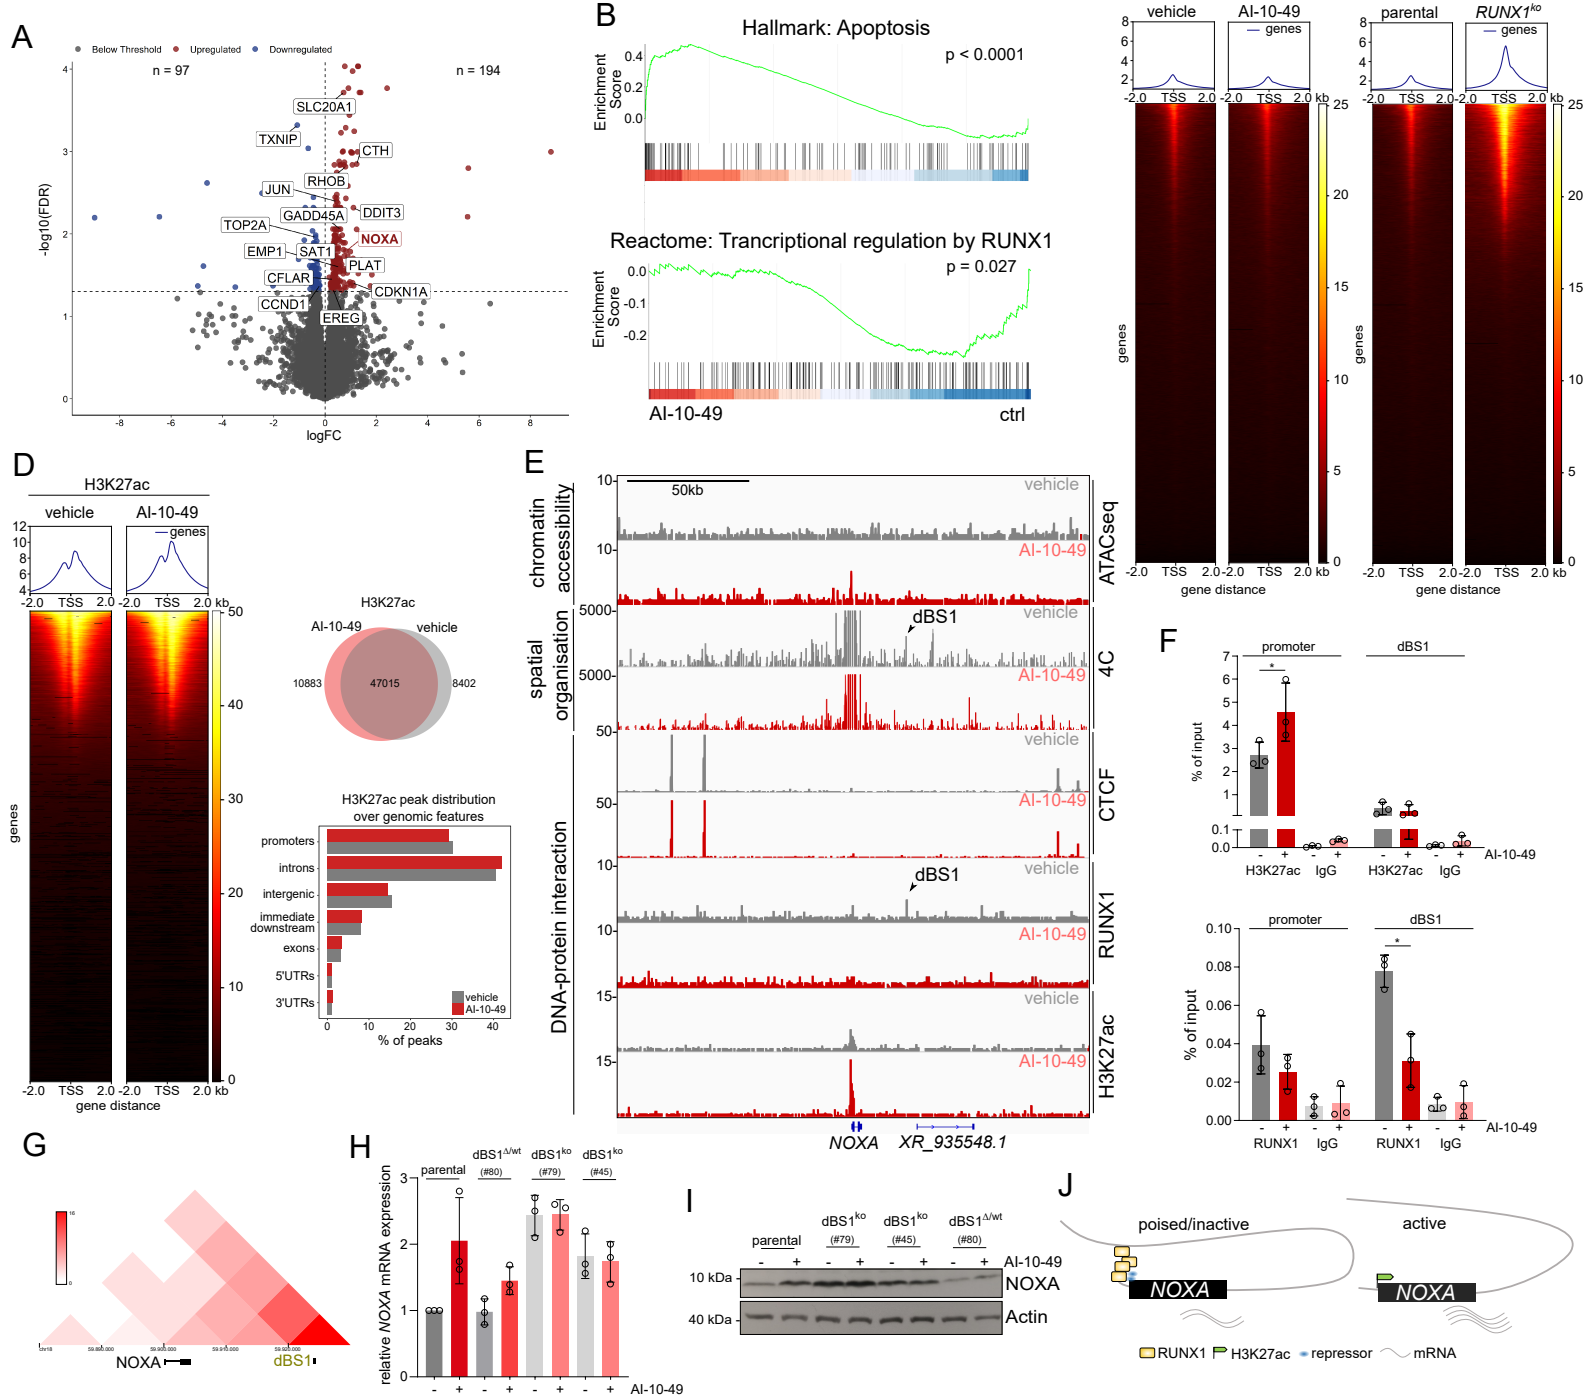



A

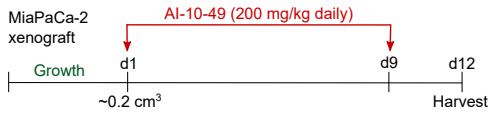

B

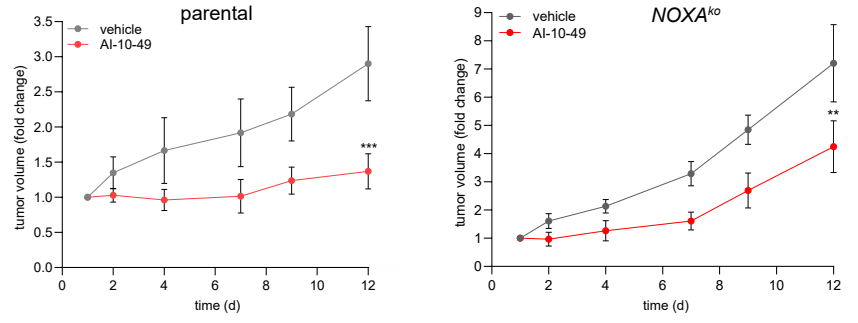

C

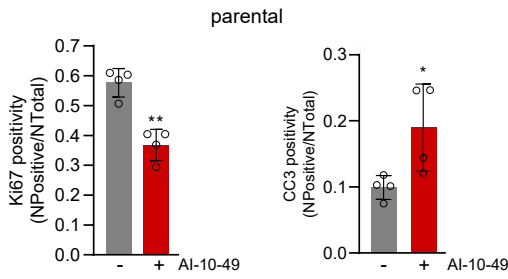

D

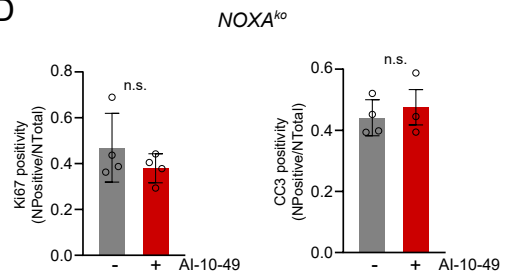

E

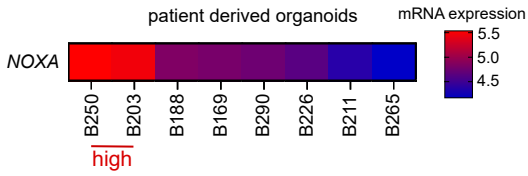

F

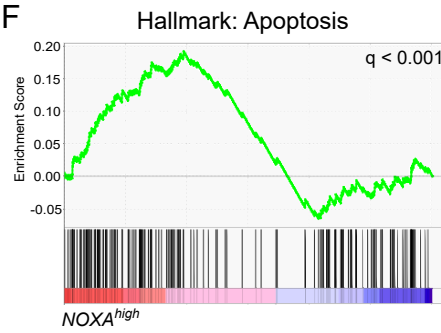

G

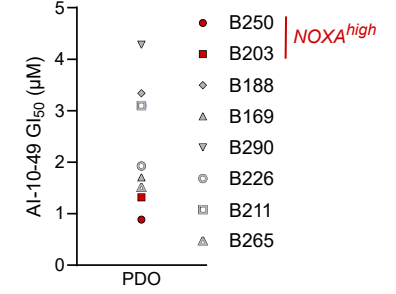

Source: http://biorxiv.org/content/10.1101/2021.10.21.465266v1.full.pdf
